# Supplementary material for: 2-oxoglutarate-dependent dioxygenases and BAHD acyltransferases drive the structural diversification of orobanchol in Fabaceae plants
Source: Front Plant Sci. 2024 Apr 18;15:1392212. doi: 10.3389/fpls.2024.1392212 (PMC11063326; doi:10.3389/fpls.2024.1392212)
Supplement: Supplementary file 2 [file Table_1.xlsx]

## Sheet: Table S1
Table S1. The sequence of primers used in this study.
primer name	sequence (5'-3')	description
MtMOS_cloning_Fw	atgagtctcaatggaggtgatgtggtagtaagt	for cloning
MtMOS_cloning_Rv	ttaaatcccacattcctttatcttcgtcgcatcg
PsFOS_cloning_Fw	atggaaatatctaaaaccagtgaaatttcagtgacaa
PsFOS_cloning_Rv	aatcttgaaatatggcaaatgagatgttccataaga
Psat0s7712g0040_cloning_Fw	acttcactctccaaaggtgatccaaaagaga
Psat0s7712g0040_cloning_Rv	agtagtcccactacgtattggagggaatct
Psat6g178000_cloning_Fw	atgggaatctctaaaaccagtgaaatttcagtgc
Psat6g178000_cloning_Rv	aaccctaaaatacggcaaaggagaagttccatct
PsFAT_cloning_Fw	atggaaatggaaataatatcaagagaattcatcaaa
PsFAT_cloning_Rv	tgaagtaatactcggatttacagaggcatattgaag
Psat1g069280_cloning_Fw	atgttcgcggcgattctgtttcctttaccg
Psat1g069280_cloning_Rv	aatggattcaagaccttgaacaaaaacggtgg
VuOAT_cloning_Fw	atggaaaaaatggagttaatatcgagagaaaccatca
VuOAT_cloning_Rv	gctaccatgttgaactaatggattaagagaagcat
MtMOS_infusion_Fw	tgaatcacaaagtgcatatgagtctcaatggaggtga	for expression in E. coli
MtMOS_infusion_Rv	gatggtgatgggtaccaatcccacattcctttatctt
PsFOS_infusion_Fw	tgaatcacaaagtgcatatggaaatatctaaaaccag
PsFOS_infusion_Rv	gatggtgatgggtaccaatcttgaaatatggcaaat
Psat0s7712g0040_infusion_Fw	tgaatcacaaagtgcatatgacttcactctccaaaggtgat
Psat0s7712g0040_infusion_Fv	gatggtgatgggtaccagtagtcccactacgtattgg
Psat6g178000_infusion_Fw	tgaatcacaaagtgcatatgggaatctctaaaaccagt
Psat6g178000_infusion_Rv	gatggtgatgggtaccaaccctaaaatacggcaaagga
PsFAT_infusion_Fw	tgaatcacaaagtgcatatggaaatggaaataatatca
PsFAT_infusion_Rv	gatggtgatgggtacctgaagtaatactcggatttac
Psat1g069280_infusion_Fw	tgaatcacaaagtgcatatgttcgcggcgattctgttt
Psat1g069280_infusion_Rv	gatggtgatgggtaccaatggattcaagaccttgaac
VuOAT_infusion_Fw	tgaatcacaaagtgcatatggaaaaaatggagttaatatcg
VuOAT_infusion_Rv	gatggtgatgggtaccgctaccatgttgaactaatgga
MtUBQ_qPCR_Fw	cccttcatcttgtccttcgtctg	for RT-qPCR analysis
MtUBQ_qPCR_Rv	cacctccaatgtaatggtctttcc
MtMOS_qPCR_Fw	agtatgcaatgccgccagat
MtMOS_qPCR_Rv	gaggcttcctgaaccgagtg
PsTUB_qPCR _Fw	cagaacaagaactcgtcatact
PsTUB_qPCR_Rv	agccttcctcctgaacata
PsFOS_qPCR_Fw	ttgccatcagtttgcagaga
PsFOS_qPCR_Rv	acagctgcaagtccctcatt
Psat0s7712g0040_qPCR_Fw	ccgccttttgcgctattcag
Psat0s7712g0040_qPCR_Rv	tgcaatcctggaacaccgtt
PsFAT_qPCR_Fw	actagtgcttgtcctgcgag
PsFAT_qPCR_Rv	aggagctccacatcgcattc
Psat1g069280_qPCR_Fw	tggatttggaaagccaaagaaagt
Psat1g069280_qPCR_Rv	tcatgcttgtcagccaaacc
VuACT_qPCR_Fw	caggaatggttaaggctggatttgctg
VuACT_qPCR_Rv	tgacccatgccaaccatcacacc
VuOAT_qPCR_Fw	gttacccttcccagttcccg
VuOAT_qPCR_Rv	agcgactcgatcttagcagc

## Sheet: Table S2
Table S2. The genes included in the co-expression gene module of PsSRF employed for the identification of PsFOS and PsFAT in pea.
PCC value	gene ID	anotation (N.A. means not anotated)
1	Psat0ss8330g0240	Dirigent-like protein (SRF)
0.9942	Psat6g215400	N.A.
0.9918	Psat6g042680	Pathogenesis-related protein Bet v 1 family
0.991	Psat3g133680	Glutathione S-transferase, N-terminal domain
0.991	Psat6g163480	Domain of unknown function (DUF3511)
0.9899	Psat1g157160	Pathogenesis-related protein Bet v 1 family
0.9897	Psat1g186560	1-deoxy-D-xylulose-5-phosphate synthase
0.9883	Psat0ss25082g0080	N.A.
0.9876	Psat2g112040	N.A.
0.9849	Psat4g221840	2OG-Fe(II) oxygenase superfamily (FOS)
0.9839	Psat3g151280	N.A.
0.9836	Psat0s1858g0240	Heavy-metal-associated domain
0.9826	Psat7g027280	N.A.
0.9822	Psat0s213g0040	Cytochrome P450
0.9816	Psat2g162240	Polyprenyl synthetase
0.9811	Psat7g230800	Plant invertase/pectin methylesterase inhibitor
0.9798	Psat5g228240	QWRF family
0.9789	Psat7g151360	SRF-type transcription factor (DNA-binding and dimerisation domain)
0.9737	Psat6g061240	Glutathione peroxidase
0.9735	Psat4g148800	Retinal pigment epithelial membrane protein
0.9724	Psat1g018160	AWPM-19-like family
0.9718	Psat0s7712g0040	2OG-Fe(II) oxygenase superfamily
0.9714	Psat4g069960	Hydrophobic seed protein
0.9694	Psat0s3261g0040	1 Pathogenesis-related protein Bet v 1 family
0.9678	Psat7g079960	Transferase family (FAT)
0.9656	Psat4g192800	Cytochrome P450
0.9648	Psat6g170960	Plastocyanin-like domain
0.9646	Psat0s691g0040	BURP domain
0.9646	Psat5g206760	N.A.
0.9614	Psat1g069280	Transferase family
0.9609	Psat3g066000	N.A.
0.9602	Psat5g080240	Glycosyl hydrolase family 9
0.9574	Psat6g058200	Beta-carotene isomerase D27-like, C-terminal (D27)
0.9574	Psat5g041320	Protein kinase domain
0.9558	Psat4g185080	Lipoxygenase
0.9534	Psat3g062920	N.A.
0.9499	Psat6g238280	N.A.
0.9474	Psat5g080280	Glycolipid transfer protein (GLTP)
0.9473	Psat5g272680	N.A.
0.9468	Psat6g027280	N.A.
0.9454	Psat2g046480	Hsp20/alpha crystallin family
0.9436	Psat7g079080	N.A.
0.9435	Psat3g176720	N.A.
0.9411	Psat4g174160	Pathogenesis-related protein Bet v 1 family
0.9391	Psat5g242280	N.A.
0.9374	Psat4g097680	N.A.
0.9363	Psat7g124200	N.A.
0.9361	Psat7g100840	N.A.
0.9327	Psat5g206680	N.A.
0.9286	Psat1g019520	Casparian strip membrane protein domain
0.9265	Psat0s4866g0040	Glycolipid transfer protein (GLTP)
0.9236	Psat1g202280	Protein of unknown function, DUF599
0.9166	Psat6g042840	Pathogenesis-related protein Bet v 1 family
0.9051	Psat4g097760	N.A.
0.899	Psat5g036360	Cytochrome P450 (CYP711A)

## Sheet: Table S3
Table S3. The top 100 probes downregulated in in root tissue of Medicago nsp2 mutant versus wild type and nsp1 mutant plants.
Probe ID	Fold Change nsp2-A17	Gene ID (N.M. means not mapped)	anotation
Mtr.43502.1.S1_at	-774.5	Medtr6g013300	proteasome subunit alpha type-5
Mtr.12315.1.S1_x_at	-434	Medtr7g065660	probable glutathione S-transferase
Mtr.13115.1.S1_at	-374.5	Medtr3g118190	MLO-like protein 1
Mtr.12577.1.S1_s_at	-120.4	N.M.
Mtr.29613.1.S1_at	-113.8	N.M.
Mtr.38864.1.S1_at	-91.6	Medtr6g018315	F-box protein At2g17036
Mtr.1122.1.S1_s_at	-72.4	Medtr6g018315	F-box protein At2g17036
Mtr.12577.1.S1_at	-70.6	N.M.
Mtr.42066.1.S1_at	-68	Medtr6g013050	purple acid phosphatase 23
Mtr.14020.1.S1_at	-45.7	Medtr1g089370	serine/threonine-protein phosphatase BSL1
Mtr.29721.1.S1_at	-39.4	Medtr6g016245	amino acid transporter AVT6A
Mtr.27518.1.S1_at	-36.8	Medtr7g059810	UPF0481 protein At3g47200
Mtr.2291.1.S1_at	-35.2	N.M.
Mtr.7710.1.S1_at	-32.5	Medtr6g016245	amino acid transporter AVT6A
Mtr.38507.1.S1_at	-25.1	Medtr1g089370	serine/threonine-protein phosphatase BSL1
Mtr.17523.1.S1_at	-17.5	Medtr3g095460	WAT1-related protein At5g64700
Mtr.13843.1.S1_at	-15.3	Medtr6g007180	photosystem I assembly factor PSA3, chloroplastic
Mtr.569.1.S1_s_at	-15	Medtr6g013230	putative F-box/LRR-repeat protein At5g41840
Mtr.38949.1.S1_x_at	-13.1	Medtr0807s0020	albumin-2
Mtr.8470.1.S1_s_at	-12.8	Medtr7g051610	beta-glucosidase 12
Mtr.23596.1.S1_s_at	-11.8	N.M.
Mtr.7635.1.S1_at	-11.3	N.M.
Mtr.42093.1.S1_at	-11.2	Medtr6g018315	F-box protein At2g17036
Mtr.19517.1.S1_at	-10.9	Medtr6g018300	ribulose bisphosphate carboxylase small chain, chloroplastic
Mtr.13269.1.S1_at	-10.5	N.M.
Mtr.42093.1.S1_x_at	-10.4	Medtr6g018315	F-box protein At2g17036
Mtr.2135.1.S1_s_at	-10.1	Medtr6g013230	putative F-box/LRR-repeat protein At5g41840
Mtr.1666.1.S1_at	-9.9	N.M.
Mtr.43424.1.S1_at	-9.7	N.M.
Mtr.5739.1.S1_at	-9.2	Medtr7g066620	receptor-like protein 14
Mtr.35945.1.S1_at	-9	Medtr6g033660	UDP-glycosyltransferase 1
Mtr.45231.1.S1_at	-8.8	Medtr3g106485	flotillin-like protein 3
Mtr.44995.1.S1_at	-7.9	N.M.
Mtr.7459.1.S1_at	-7.6	Medtr6g015490	disease resistance protein RUN1
Mtr.38949.1.S1_at	-6.8	Medtr0807s0020	albumin-2
Mtr.38494.1.S1_at	-6.7	Medtr6g052760	disease resistance protein RGA2
Mtr.33112.1.S1_at	-6.7	Medtr8g007095	patatin-like protein 2
Mtr.38508.1.S1_at	-6.5	Medtr1g089370	serine/threonine-protein phosphatase BSL1
Mtr.25451.1.S1_s_at	-6.3	Medtr4g074670	alanine--tRNA ligase
Mtr.48470.1.S1_at	-6.2	Medtr2g076460	MuDRA-like transposase
Mtr.41147.1.S1_at	-6.1	N.M.
Mtr.13904.1.S1_at	-6	Medtr4g057730	4-coumarate--CoA ligase-like 7
Mtr.1810.1.S1_at	-5.8	N.M.
Mtr.31788.1.S1_at	-5.8	Medtr6g015890	putative F-box/LRR-repeat protein 23
Mtr.11820.1.S1_x_at	-5.7	Medtr0475s0020	7-deoxyloganetin glucosyltransferase-like
Mtr.48675.1.S1_s_at	-5.6	Medtr6g013050	purple acid phosphatase 23
Mtr.52163.1.S1_at	-5.3	Medtr2g076460	MuDRA-like transposase
Mtr.43310.1.S1_at	-5.3	Medtr6g452490	disease resistance protein RGA2
Mtr.8426.1.S1_at	-5	Medtr6g011870	chlorophyll a-b binding protein of LHCII type 1
Mtr.48681.1.S1_at	-5	N.M.
Mtr.40279.1.S1_at	-4.8	Medtr7g065720	probable glutathione S-transferase
Mtr.10626.1.S1_at	-4.7	Medtr7g063730	2OG-Fe(II) oxygenase superfamily (MOS)
Mtr.33562.1.S1_at	-4.5	Medtr7g063950	glycine-rich cell wall structural protein
Mtr.10681.1.S1_at	-4.3	Medtr1g087200	universal stress protein PHOS32
Mtr.13908.1.S1_at	-4.3	Medtr6g464120	carboxylesterase 1
Mtr.42339.1.S1_at	-4.2	Medtr2g100880	histidine-containing phosphotransfer protein 4
Mtr.35078.1.S1_at	-4.2	Medtr6g009720	AAA-ATPase At3g28510
Mtr.10604.1.S1_at	-4.2	Medtr5g059820	nitrate reductase [NADH]
Mtr.8517.1.S1_at	-4.2	Medtr5g031250	probable mannitol dehydrogenase
Mtr.45148.1.S1_at	-4.1	Medtr7g050540	cytochrome c oxidase-assembly factor COX23, mitochondrial
Mtr.31557.1.S1_at	-4.1	N.M.
Mtr.11695.1.S1_at	-4.1	Medtr0022s0360	probable RNA-binding protein 18
Mtr.10450.1.S1_at	-4	Medtr3g110172	bark storage protein A
Mtr.25731.1.S1_at	-3.9	Medtr6g013200	lamin-like protein
Mtr.2334.1.S1_at	-3.9	Medtr3g448640	putative protein FAR1-RELATED SEQUENCE 10
Mtr.21972.1.S1_at	-3.7	Medtr7g052300	uncharacterized LOC11431689
Mtr.13183.1.S1_at	-3.5	N.M.
Mtr.6718.1.S1_at	-3.5	N.M.
Mtr.47199.1.S1_at	-3.5	N.M.
Mtr.35681.1.S1_at	-3.5	N.M.
Mtr.33530.1.S1_at	-3.5	Medtr2g022430	probable aspartic proteinase GIP2
Mtr.47631.1.S1_s_at	-3.5	N.M.
Mtr.34638.1.S1_at	-3.5	Medtr4g119040	monothiol glutaredoxin-S2
Mtr.42692.1.S1_at	-3.4	Medtr1g088910	glutaredoxin-C11
Mtr.43831.1.S1_at	-3.4	Medtr6g049050	SKP1-interacting partner 15
Mtr.35757.1.S1_at	-3.4	Medtr7g063320	NADP)-binding rossmann-fold protein
Mtr.48064.1.S1_at	-3.3	Medtr6g051780	uncharacterized protein PAM68-like
Mtr.43048.1.S1_at	-3.3	N.M.
Mtr.31645.1.S1_at	-3.3	Medtr2g045280	guanosine deaminase
Mtr.21112.1.S1_at	-3.3	Medtr6g052760	disease resistance protein RGA2
Mtr.10545.1.S1_at	-3.3	N.M.
Mtr.30965.1.S1_at	-3.3	N.M.
Mtr.15275.1.S1_at	-3.2	Medtr2g076590	epidermis-specific secreted glycoprotein EP1
Mtr.38954.1.S1_at	-3.2	Medtr1g100150	ferric reduction oxidase 4
Mtr.7244.1.S1_at	-3.2	Medtr3g009010	probable glucan 1,3-beta-glucosidase A
Mtr.37288.1.S1_at	-3.1	Medtr7g051610	beta-glucosidase 12
Mtr.26939.1.S1_at	-3.1	Medtr7g079320	wall-associated receptor kinase-like 1
Mtr.12428.1.S1_at	-3.1	Medtr1g066530	albumin-2
Mtr.2631.1.S1_at	-3.1	Medtr0591s0010	caffeic acid 3-O-methyltransferase
Mtr.34470.1.S1_s_at	-3.1	Medtr7g068380	vacuolar cation/proton exchanger 3
Mtr.11820.1.S1_at	-3.1	Medtr0475s0020	7-deoxyloganetin glucosyltransferase-like
Mtr.11364.1.S1_at	-3	Medtr1g085680	cytochrome P450 709B2
Mtr.38932.1.S1_at	-3	Medtr8g028225	malate synthase, glyoxysomal
Mtr.28845.1.S1_at	-3	N.M.
Mtr.32209.1.S1_at	-3	N.M.
Mtr.41195.1.S1_at	-3	N.M.
Mtr.37084.1.S1_at	-2.9	N.M.
Mtr.5456.1.S1_at	-2.9	Medtr6g027620	valine--tRNA ligase, chloroplastic/mitochondrial 2
Mtr.37624.1.S1_s_at	-2.9	Medtr7g110130	short-chain dehydrogenase reductase 3b
Mtr.25691.1.S1_s_at	-2.9	Medtr1g036210	TNP2, putative
